# Supplementary material for: Autofluorescence of atmospheric bioaerosols – fluorescent biomolecules and potential interferences
Source: Copernicus journal article supplement (doi:10.5194/amt-5-37-2012), 2012-01-09
Supplement: Supplementary file 1 [file amt-5-37-2012-supplement.pdf]

## Supporting Online Material

Autofluorescence of atmospheric bioaerosols –  
Fluorescent biomolecules and potential interferences

Christopher Pöhlker<sup>1</sup>, J. Alex Huffman<sup>1,2 \*</sup>, Ulrich Pöschl<sup>1</sup>

<sup>1</sup>*Max Planck Institute for Chemistry, Biogeochemistry Department, P.O. Box 3060, D-55020 Mainz, Germany*

<sup>2</sup>*University of Denver, Department of Chemistry and Biochemistry, 2190 E. Illif, Denver, Colorado 80208, USA*

*\*Corresponding author: alex.huffman@du.edu*

**Keywords:** Autofluorescence, Bioaerosols, Excitation-Emission-Matrix, Fluorescence Spectroscopy, Fluorophores

EEM normalization:

The intensity of all raw EEMs of solid state samples shown in this paper have been normalized as described in Section 3.2. Figure S1 shows tails of transmitted light on the left and right side of the Rayleigh scattering bands (1<sup>st</sup> and 2<sup>nd</sup> order) due to imperfect monochromators. In particular, this effect was magnified by the instrument settings utilized in this study, because the excitation and emission slit widths were fixed at relatively large values of 10 nm each. This setting allows a higher quantity of light to pass the slits, which provides the advantage of increased sensitivity. However, it also decreases spectral resolution and increases the spurious background light as discussed. Superposition of these spurious light effects leads to the elevated background signal ('plateau') that can be observed between the 1<sup>st</sup> and 2<sup>nd</sup> order Rayleigh lines.

Fluorescence spectra of solid state, powder samples in this study were corrected for spurious background light, which was observed to be significantly stronger for white (non-absorbing) materials than for materials of other colors. A normalization factor (NF) has been calculated as a function of the emitted light intensity to the left of 1<sup>st</sup> order Rayleigh scattering within an EEM. This light, by definition, cannot be considered fluorescent, because the wavelength of emission would be shorter than the wavelength of excitation. The NF was calculated as the mean "emission" signal on a line parallel to the 1<sup>st</sup> order Rayleigh signal, but separated by 40 nm vertically ( $\Delta$ ) in the EEM (thus in excitation). A  $\Delta$  value of 40 nm was utilized because it was found to be a compromise between two factors. Allowing the  $\Delta$  value to decrease caused an increase in the noise of the normalization due to the fact that the NF line became increasingly close to the steeply increasing 1<sup>st</sup> order Rayleigh scattering signal. Allowing the  $\Delta$  value to increase reduced the magnitude of the normalization as a function of the decreasing intensity of the light leakage tail. A large  $\Delta$  value also chopped data from the right side of each normalized EEM (high emission values), caused by corresponding reduction in vertical range (excitation) in the plot. In Figure S1 the lines for NF-calculation are shown for kaolin, chitin and humic acid (Fig. S1a-c). In Figure S1d the profiles of these lines are shown highlighting that the intensity background light strongly varies with  $\lambda_{em}$ . The highest intensities (e.g. for kaolin) were observed between 375 and 500 nm. Moreover NF show the highest values for white and highly reflecting materials (i.e.  $NF_{kaolin} = 189$ , white powder) and significantly lower values for darker and less reflecting materials (i.e.  $NF_{humic\ acid} = 29$ , dark brown powder).

Due to the wavelength dependence of the spurious light intensity along the normalization line attempts to normalize the EEM matrix based on individual excitation (horizontally) or emission (vertically) wavelengths, respectively, were performed. Two major problems were produced by this procedure, however. (I) Significant qualitative changes are reflected into the EEM by the peaking intensity of the normalization line. It has been found that these changes thus influence the characteristic fluorescence pattern in the EEMs ('shadowing effect'). (II). Moreover a certain area of the EEM cannot be normalized because the normalization line is accessible in vertical and horizontal direction only for a certain wavelength range. Accordingly for horizontal normalization the lower excitation wavelengths and for vertical normalization the upper emission wavelengths are chopped off.

For comparison with normalized EEMs a collection of non-normalized raw EEMs can be found in Figure S4 and S5.

**Figure S1.** Conceptual illustration of normalization for (a) kaolin, (b) chitin and (c) humic acid. Colored normalization lines for calculation of NF are shown in (d) for comparison.

**Figure S2.** Additional EEM contour profiles for selected pure biological fluorophores in solid, suspended or solvated state. Color intensity scale has been adjusted to intensity of individual components. All EEMs are normalized as discussed in text (Section 3.2). Normalization factor (NF) is reported for each solid-state sample. Lower NF indicates higher fluorescence intensity.

**Figure S3.** Additional EEM contour profiles for selected potential interferences in solid or solved state. Intensity color scale has been adjusted to intensity of individual components. All EEMs are normalized as discussed in text (Section 3.2). Normalization factor (NF) is reported for each solid-state sample.

**Figure S4.** Raw EEM contour profiles for selected pure biological fluorophores in solid, suspended or solved state. Intensity color scale has been adjusted to intensity of individual components.

**Figure S5.** Raw EEM contour profiles for selected potential interferences in solid, suspended or solved state. Intensity color scale has been adjusted to intensity of individual components.

**Figure S6.** Normalized fluorescence emission spectra of biofluorophores and potential interferences for selected excitation wavelanghts  $\lambda_{\text{ex}}$ ; (a) Emission spectra of biological fluorophores at  $\lambda_{\text{ex}} = 280$  nm; (b) Emission spectra of biological fluorophores at  $\lambda_{\text{ex}} = 355$  nm; (c) Emission spectra of biological fluorophores at  $\lambda_{\text{ex}} = 405$  nm; (d) Emission spectra of potential interferences at  $\lambda_{\text{ex}} = 280$  nm; (e) Emission spectra of potential interferences at  $\lambda_{\text{ex}} = 355$  nm; (f) Emission spectra of potential interferences at  $\lambda_{\text{ex}} = 405$  nm. Dashed lines indicate samples in dry state, solid lines indicate samples in solution. Spectra were scaled in some cases to fit on same y-axis.

**Figure S7.** Raw fluorescence emission spectra of biofluorophores and potential interferences for selected excitation wavelanghts  $\lambda_{\text{ex}}$ ; (a) Emission spectra of biological fluorophores at  $\lambda_{\text{ex}} = 280$  nm; (b) Emission spectra of biological fluorophores at  $\lambda_{\text{ex}} = 355$  nm; (c) Emission spectra of potential interferences at  $\lambda_{\text{ex}} = 280$  nm; (d) Emission spectra of potential interferences at  $\lambda_{\text{ex}} = 355$  nm. Dashed lines indicate samples in dry state, solid lines indicate samples in solution.



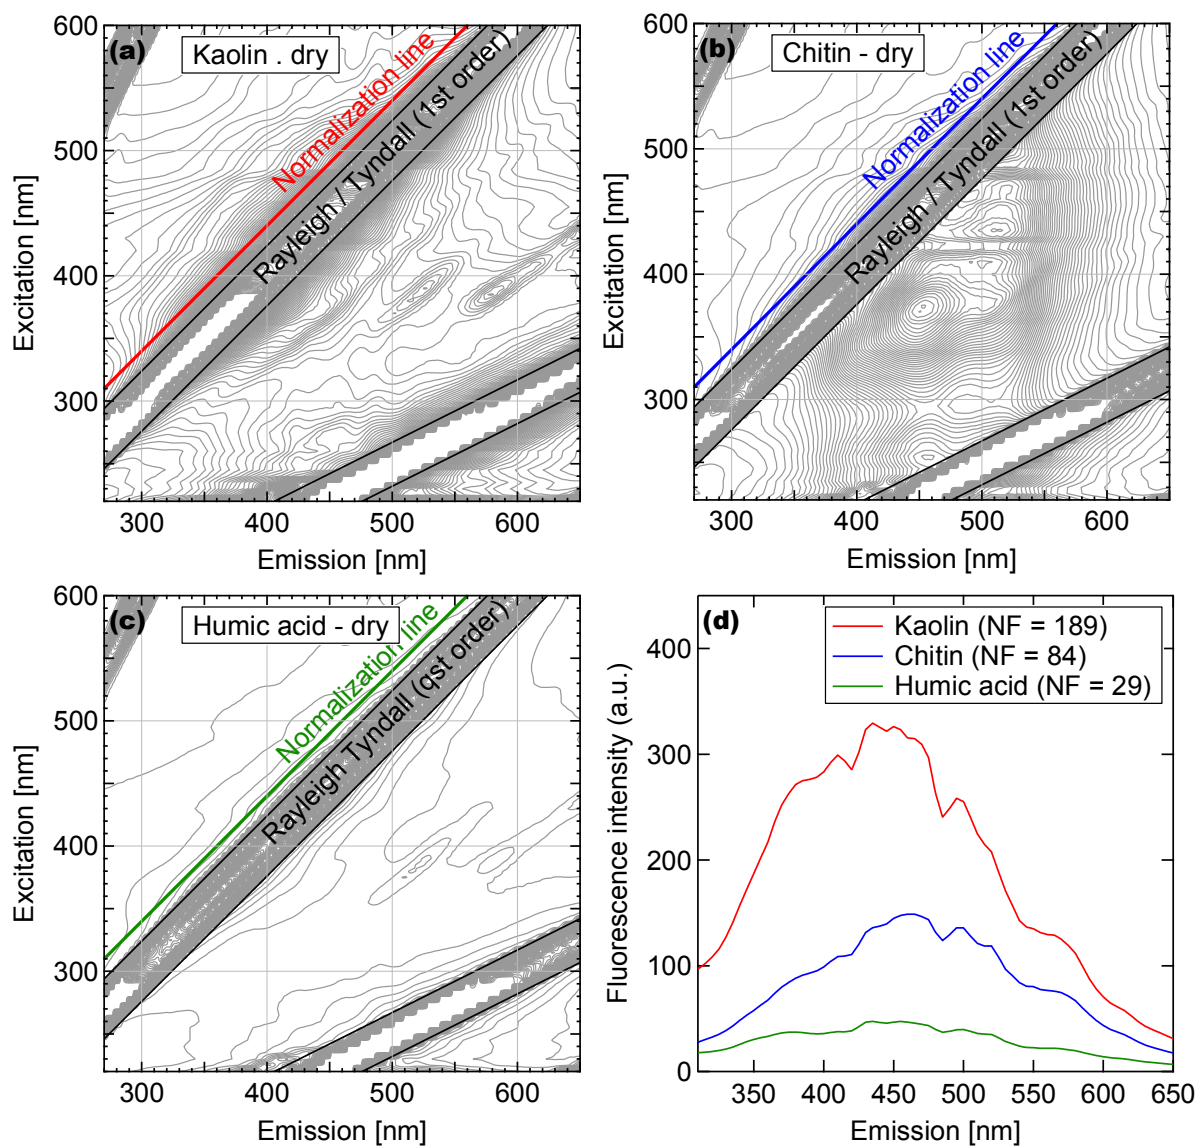

**Figure S1.**

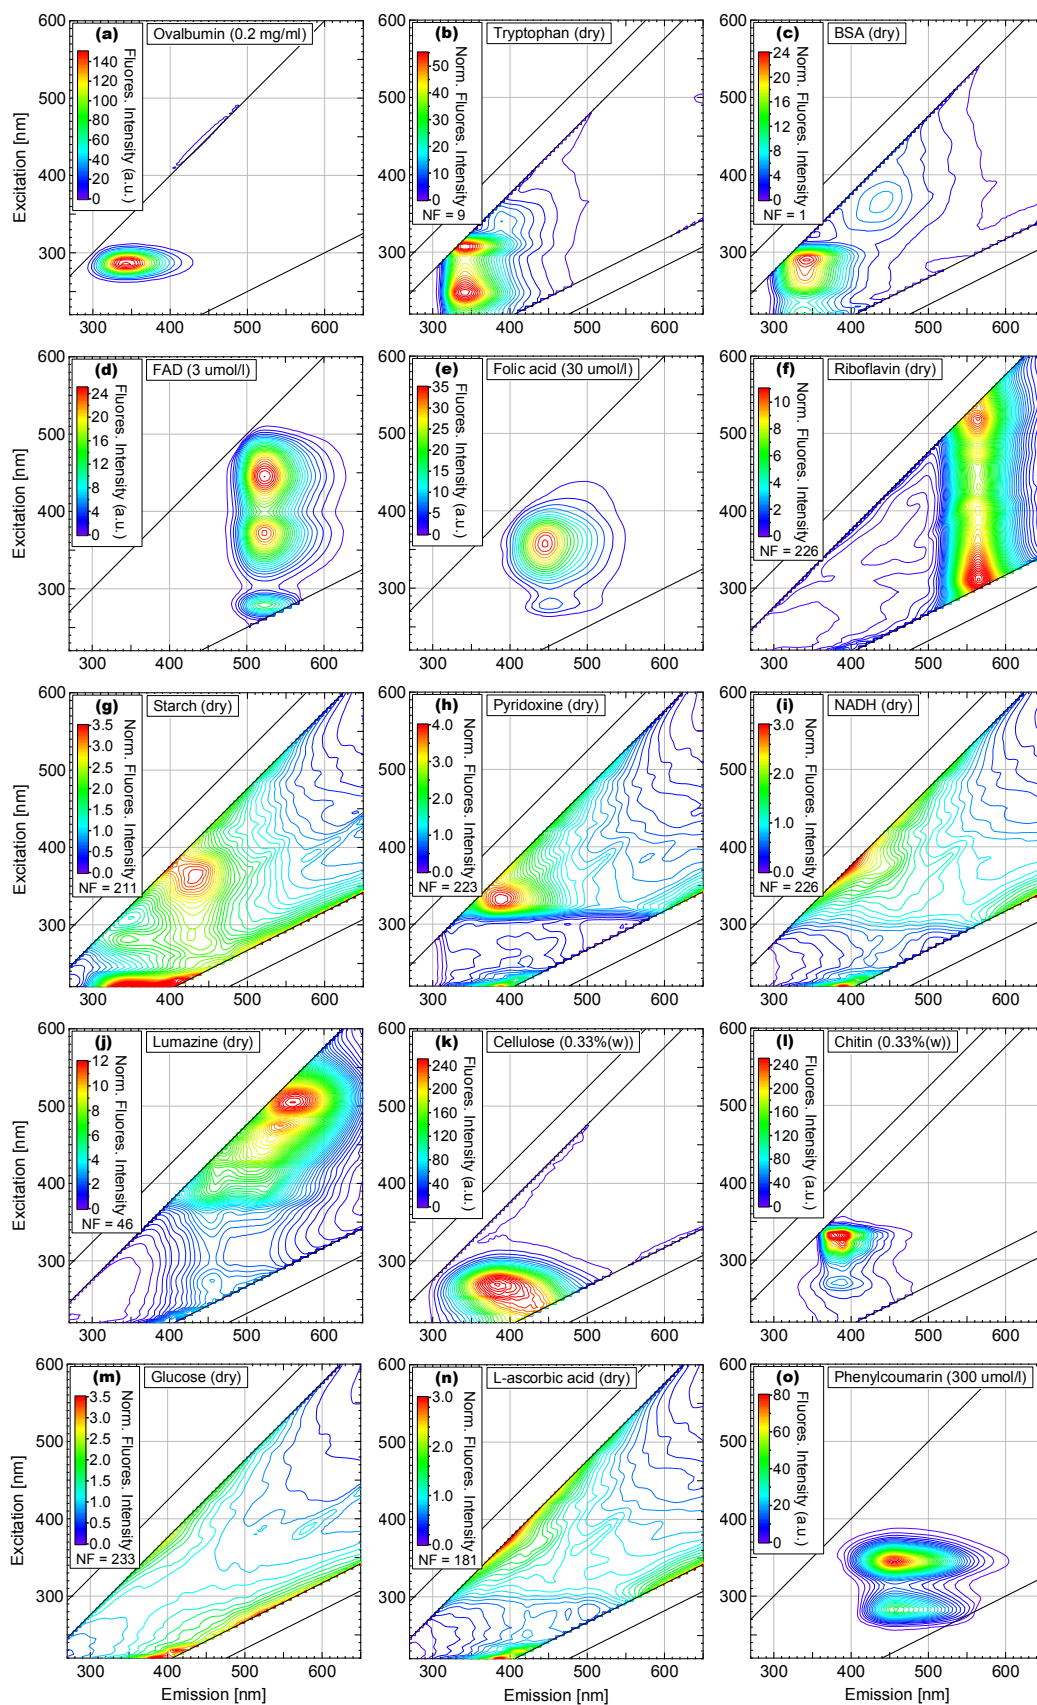

Figure S2.

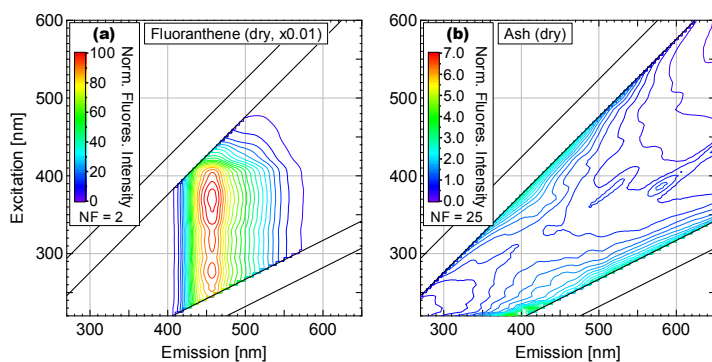

Figure S3.

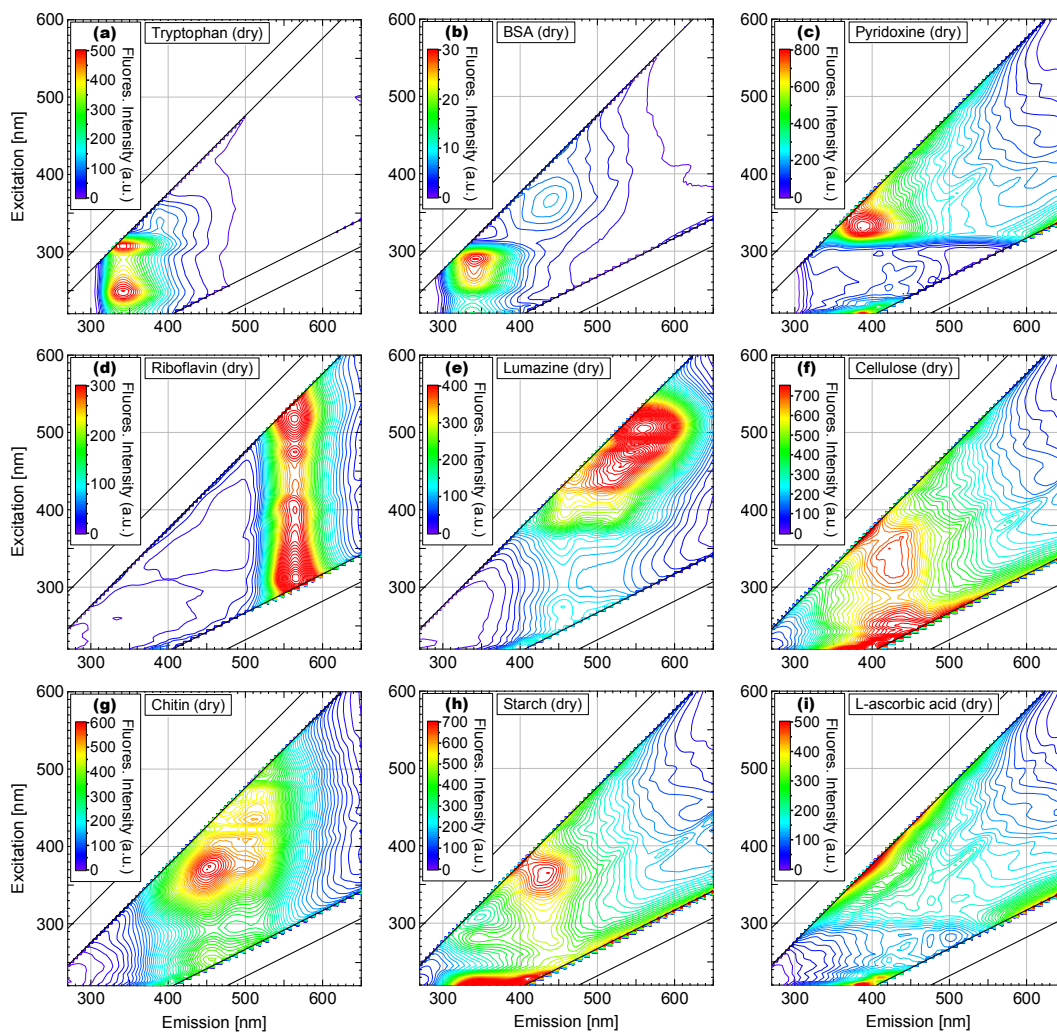

Figure S4.

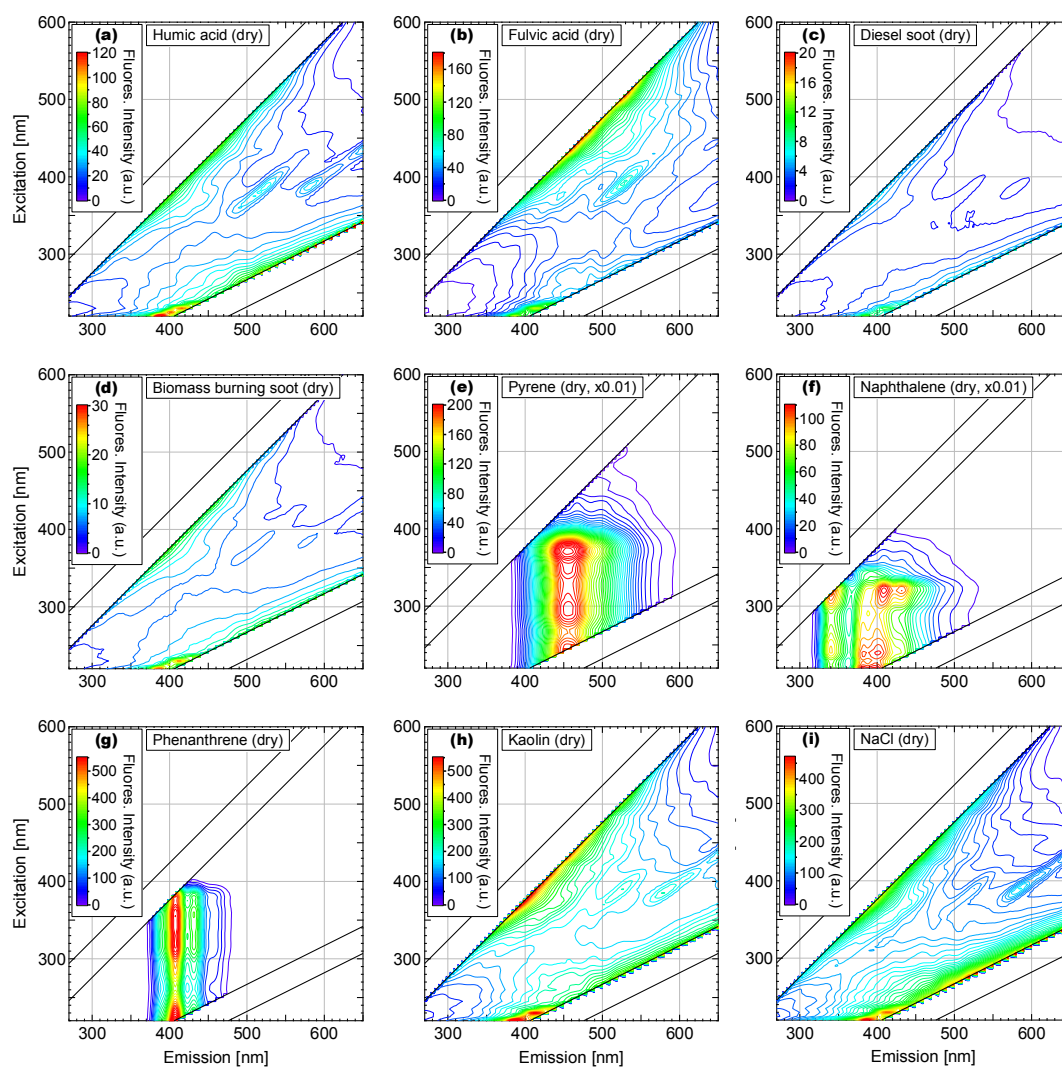

**Figure S5.**



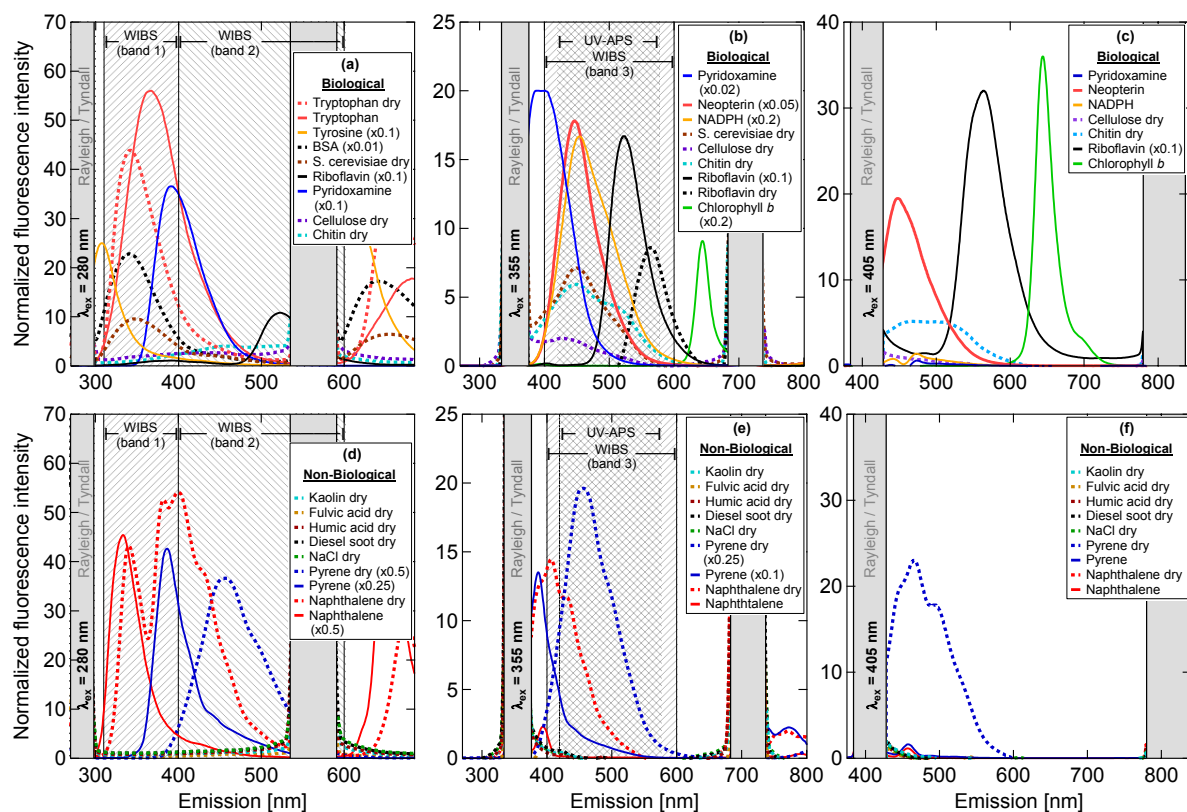

Figure S6.

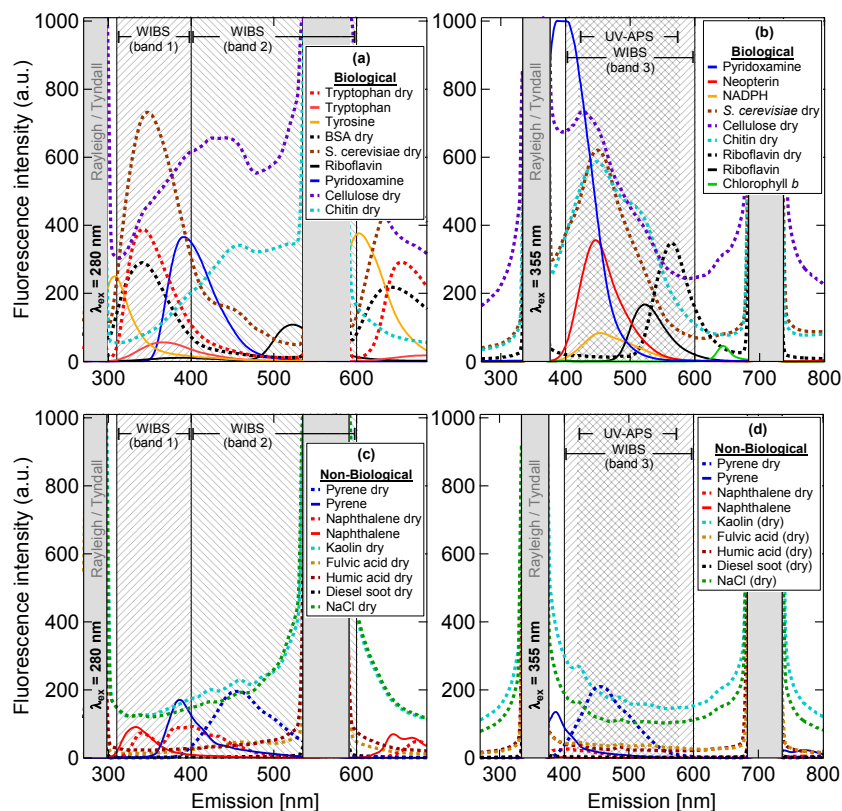

Figure S7.
